# Supplementary material for: Biosynthesis of Smaller-Sized Platinum Nanoparticles Using the Leaf Extract of Combretum erythrophyllum and Its Antibacterial Activities
Source: MDPI journal article supplement (doi:10.3390/antibiotics10111275), 2021-10-20
Supplement: s1 [file s1]

## Supplementary Materials

### Biosynthesis of Smaller-Sized Platinum Nanoparticles Using the Leaf Extract of *Combretum erythrophyllum* and Its Antibacterial Activities

Olufunto T. Fanoro, Sundararajan Parani, Rodney Maluleke, Thabang C. Lebepe, Rajendran J. Varghese, Nande Mgedle, Vuyo Mavumengwana and Oluwatobi S. Oluwafemi

**Table S1.** Antibacterial Study of PtNPs, CE Extract and Streptomycin via Minimum Inhibitory Concentration Method.

| S.N. | Bacterial Strain                                      | Gram +/- | PtNPs (µg/mL) | CE Extract (µg/mL) | Streptomycin (µg/mL) |
|------|-------------------------------------------------------|----------|---------------|--------------------|----------------------|
| 1    | <i>Staphylococcus epidermidis</i> (Se)<br>(ATCC14990) | +Ve      | 3.125         | -                  | 1.56                 |
| 2    | <i>Proteus mirabilis</i> (Pm)<br>(ATCC 7002)          | -Ve      | 3.125         | -                  | 1.56                 |
| 3    | <i>Escherichia coli</i> (Ec)<br>(ATCC 25922)          | -Ve      | -             | -                  | 1.56                 |
| 4    | <i>Staphylococcus aureus</i> (Sa)<br>(ATCC 25923)     | +Ve      | -             | -                  | 1.56                 |
| 5    | <i>Klebsiella pneumoniae</i> (Kp)<br>(ATCC 13822)     | -Ve      | 2000          | 125                | 1.56                 |
| 6    | <i>Klebsiella oxytoca</i> (Ko)<br>(ATCC 8724)         | -Ve      | 1.56          | -                  | 1.56                 |
| 7    | <i>Mycobacterium smegmatis</i> (Ms)<br>(MC 2155)      | +Ve      | -             | 2000               | 1.56                 |
| 8    | <i>Klebsiella aerogenes</i> (Ka)<br>(ATCC 27853)      | -Ve      | 1.56          | -                  | 1.56                 |
| 9    | <i>Bacillus cereus</i> (Bc)<br>(ATCC 10876)           | +Ve      | 1.56          | -                  | -                    |
| 10   | <i>Proteus vulgaris</i> (Pv)<br>(ATCC 6380)           | -Ve      | -             | -                  | -                    |
| 11   | <i>Bacillus subtilis</i> (Bs)<br>(ATCC 19659)         | +Ve      | 500           | 2000               | -                    |
| 12   | <i>Enterococcus faecalis</i> (Ef)<br>(ATCC 13047)     | +Ve      | 2000          | -                  | -                    |
